# Supplementary material
Source: PubMed Central journal article supplement (PMC10408266)
Supplement: jama-e2224683-s002.pdf [file jama-e2224683-s002.pdf]

## Data Sharing Statement

Hong. Predictive Accuracy of Stroke Risk Prediction Models Across Black and White Race, Sex, and Age Groups. *JAMA*. Published January 24, 2023. doi:10.1001/jama.2022.24683

### Data

**Data available:** Yes

**Data types:** Data dictionary, Other (please specify)

**Additional Information:** Data harmonization and analytic codes. We are not allowed to share individual patient data per agreements with dbGap and REGARDS.

**How to access data:** Data Sharing Statement The de-identified data for the Framingham, ARIC and MESA studies can be obtained from the NIH dbGaP repository. The de-identified data of REGARDS were directly obtained from the REGARDS data coordinating center. All definitions and data dictionary are available in a publicly available repository hosted by the AHA Precision Medicine Platform (PMP) alongside the source code at:

<https://precision.heart.org/duke-ninds> The data harmonization and analytic codes are available at: [https://github.com/duke-harmonization/manual\\_harmonization](https://github.com/duke-harmonization/manual_harmonization) <https://github.com/duke-harmonization/stroke-risk-prediction-models>

**When available:** With publication

### Supporting Documents

**Document types:** None

### Additional Information

**Who can access the data:** Anyone requesting the data.

**Types of analyses:** for any purpose

**Mechanisms of data availability:** on AHA PMP platform, without investigator support
